# Supplementary material for: A graphene-like Mg3N2monolayer: high stability, desirable direct band gap and promising carrier mobility
Source: Royal Society of Chemistry journal article supplement (doi:10.1039/c6cp06332b), 2016-01-01
Supplement: c6cp06332b1.pdf [file c6cp06332b1.pdf]

## Electronic Supplementary Information

# Graphene-like $\text{Mg}_3\text{N}_2$ Monolayer: High Stability, Desirable Direct Band Gap and Promising Carrier Mobility

Peng-Fei Liu,<sup>a,c</sup> Liujiang Zhou,<sup>\*,b</sup> Thomas Frauenheim,<sup>b</sup> Li-Ming Wu<sup>\*,a</sup>

<sup>a</sup> *State Key Laboratory of Structural Chemistry, Fujian Institute of Research on the Structure of Matter, Chinese Academy of Sciences, Fuzhou, Fujian 350002, People's Republic of China*

<sup>b</sup> *Bremen Center for Computational Materials Science, University of Bremen, Am Falturm 1, 28359 Bremen, Germany*

<sup>c</sup> *University of Chinese Academy of Sciences, Beijing 100039, People's Republic of China*

## SUPPORTING INFORMATION

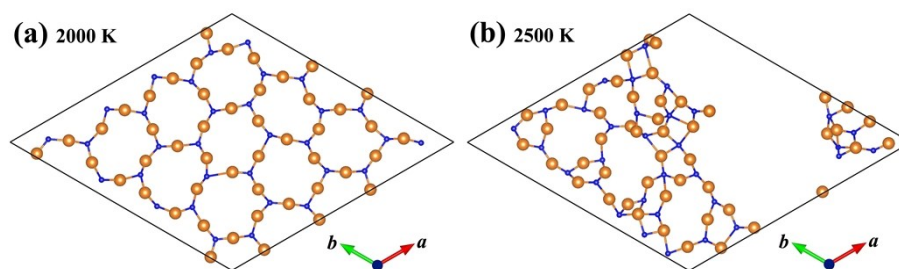

Figure S1. Top view of a snapshot of monolayer g-Mg<sub>3</sub>N<sub>2</sub> of the *ab-initio* molecular dynamics simulation at (a) 2000 K and (b) 2500 K.  $4 \times 4 \times 1$  supercell is used and labeled by black solid line.

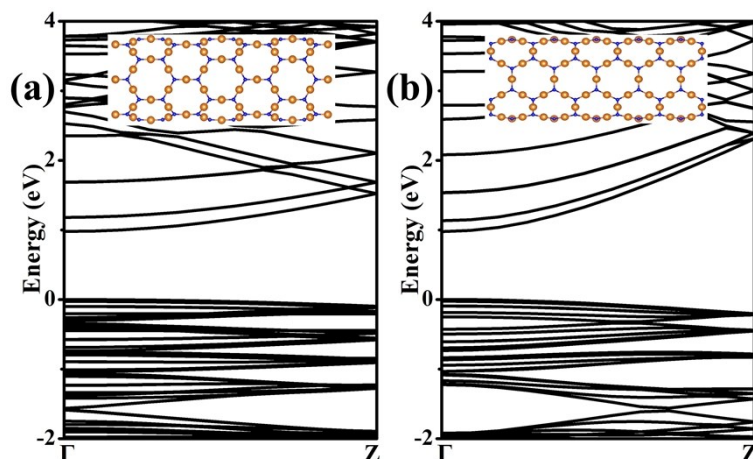

Figure S2. Band structure of armchair (6,6) and zigzag (8,4) tubes.

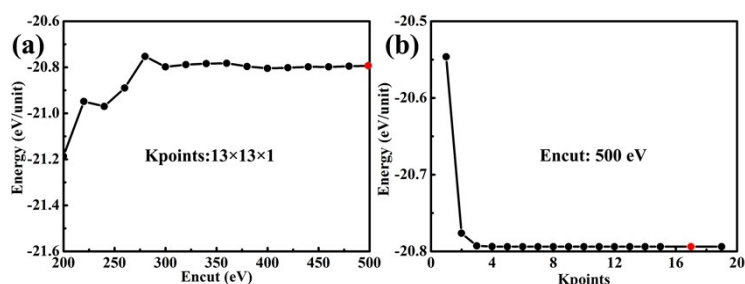

Figure S3. The convergence tests for (a) K-point grids and (b) cutoff energy. Red dots are the parameters we have used in the calculations.

Table S1. The calculated energies of 2D g-Mg<sub>3</sub>N<sub>2</sub>, isolated Mg and isolated N atoms, respectively.

| System      | g-Mg <sub>3</sub> N <sub>2</sub> | isolated Mg atom | isolated N atom |
|-------------|----------------------------------|------------------|-----------------|
| Energy (eV) | -20.764                          | -0.075           | -3.124          |
